# Supplementary material
Source: HighWire-hosted journal article supplement (http://www.ajnr.org/highwire/filestream/64960/field_highwire_adjunct_files/0/18-00624.pdf)
Supplement: 18-00624.pdf [file 18-00624.pdf]

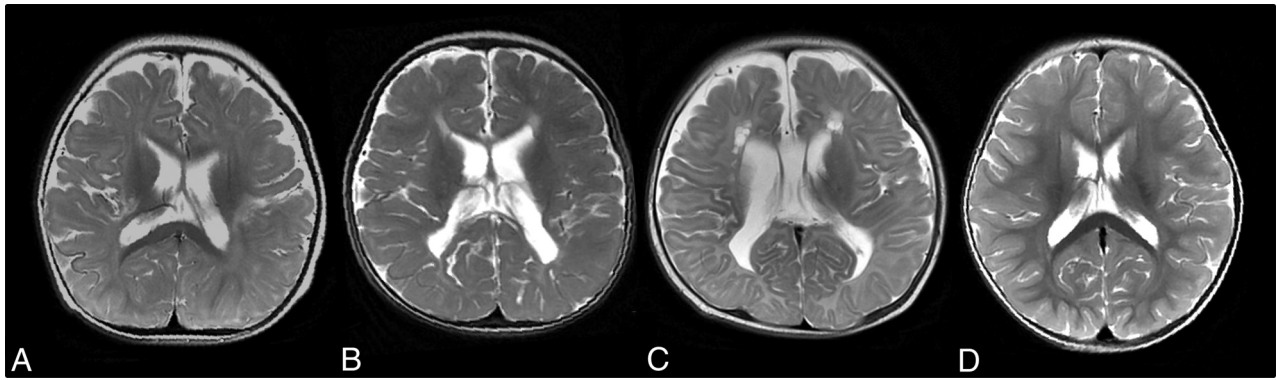

**ON-LINE FIG 1.** MR imaging appearances of infants with PWMI and controls on T2-weighted images. *A*, Mild, hyperintensity in the periventricular white matter and volume decrease limited to the peritrigonal region with normal ventricles. *B*, Moderate, hyperintensity in the periventricular white matter with moderate periventricular white matter decrease and irregular enlargement of the ventricles. *C*, Severe, multicystic changes in the periventricular white matter with marked reduction of periventricular white matter and severe irregular enlargement of ventricles. *D*, Term infant without PWMI.

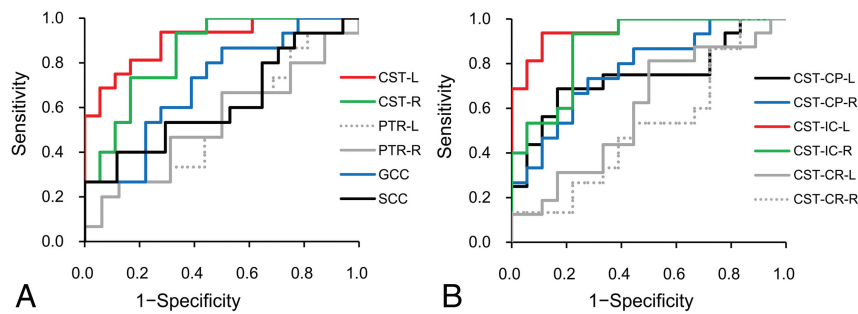

**ON-LINE FIG 2.** Receiver operating characteristic curve analysis for differentiating infants with PWMI with bilateral SCP from those without CP using the following indicators: *A*, FA along the bilateral corticospinal tract, bilateral posterior thalamic radiation, genu of the corpus callosum, and splenium of the corpus callosum; *B*, FA along the bilateral CST at the cerebral peduncle level, bilateral CST at the internal capsule level, and bilateral CST at the corona radiata level. L indicates left; R, right.

**On-line Table 1: Clinical information on infants with PWMI**

|                                 | PWMI with SCP (n = 20) | PWMI without CP (n = 19) |
|---------------------------------|------------------------|--------------------------|
| Hypoxic-ischemic encephalopathy | 14 (70%)               | 10 (53%)                 |
| Neonatal asphyxia               | 12 (60%)               | 8 (42%)                  |
| Fetal distress                  | 5 (25%)                | 5 (26%)                  |
| Amniotic fluid pollution        | 5 (25%)                | 4 (21%)                  |
| Cord around fetal neck          | 6 (30%)                | 4 (21%)                  |
| Spontaneous delivery            | 10 (50%)               | 10 (53%)                 |
| Cesarean delivery               | 10 (50%)               | 9 (47%)                  |
| Neonatal anemia                 | 2 (10%)                | 2 (11%)                  |
| Hyperbilirubinemia              | 4 (20%)                | 2 (11%)                  |
| Neonatal hypoglycemia           | 2 (10%)                | 3 (16%)                  |
| Gestational age <37 wk          | 12 (60%)               | 10 (53%)                 |

**On-line Table 2: Correlations between fractional anisotropy values and motor function scores in infants with PWMI**

|          | GMFCS |          | PDI  |          |
|----------|-------|----------|------|----------|
|          | r     | P Values | r    | P Values |
| CST-L    | -0.77 | <.01     | 0.68 | <.01     |
| CST-R    | -0.69 | <.01     | 0.52 | <.01     |
| PTR-L    | -0.44 | .02      | 0.19 | .33      |
| PTR-R    | -0.48 | <.01     | 0.01 | .98      |
| GCC      | -0.42 | .02      | 0.47 | <.01     |
| SCC      | -0.43 | .02      | 0.59 | <.01     |
| CST-CP-L | -0.56 | <.01     | 0.45 | .01      |
| CST-CP-R | -0.54 | <.01     | 0.41 | .02      |
| CST-IC-L | -0.80 | <.01     | 0.69 | <.01     |
| CST-IC-R | -0.79 | <.01     | 0.53 | <.01     |
| CST-CR-L | -0.27 | .15      | 0.37 | .04      |
| CST-CR-R | -0.09 | .65      | 0.12 | .53      |

**Note:**—PDI indicates Psychomotor Development Index; L, left; R, right.

**On-line Table 3: Multiple regression analysis among fractional anisotropy, Gross Motor Function Classification System, and age at MRI in infants with PWMI**

|          | Determination Coefficient ( $R^2$ ) | P Values |     |
|----------|-------------------------------------|----------|-----|
|          |                                     | GMFCS    | Age |
| CST-L    | 0.56                                | <.01     | .84 |
| CST-R    | 0.52                                | <.01     | .20 |
| PTR-L    | 0.20                                | .01      | .61 |
| PTR-R    | 0.26                                | <.01     | .79 |
| GCC      | 0.19                                | .02      | .78 |
| SCC      | 0.22                                | .01      | .39 |
| CST-CP-L | 0.32                                | <.01     | .93 |
| CST-CP-R | 0.31                                | <.01     | .77 |
| CST-IC-L | 0.64                                | <.01     | .16 |
| CST-IC-R | 0.63                                | <.01     | .31 |
| CST-CR-L | 0.13                                | .13      | .27 |
| CST-CR-R | 0.08                                | .62      | .17 |

**Note:**—L indicates left; R, right.
